# Supplementary material
Source: PubMed Central journal article supplement (PMC8262621)
Supplement: NEJMc2107717_disclosures.pdf [file NEJMc2107717_disclosures.pdf]

**Disclosure Purpose:** 21-07717

**Summary of Interests**

I do not have any interests to disclose at this time.

**Additional Questions:**

- 1. **Are there other relationships or activities that readers could perceive to have influenced, or that give the appearance of potentially influencing, what you wrote in the submitted work?**  
No.
- 2. **What is the manuscript title?**  
Impact of Vaccination on Household Transmission of SARS-COV-2 in England
- 3. **Are you the corresponding author?**  
No.

**Certification**

I certify that the information provided in this disclosure is complete and accurate.

Disclosure Purpose: 21-07717

Summary of Interests

**Company or Organization**

| Entity                                                                                                                                                                                                                                                                                                                                                                                                                                                                                          | Type             | Interest Held By                                                                |
|-------------------------------------------------------------------------------------------------------------------------------------------------------------------------------------------------------------------------------------------------------------------------------------------------------------------------------------------------------------------------------------------------------------------------------------------------------------------------------------------------|------------------|---------------------------------------------------------------------------------|
| GlaxoSmithKline                                                                                                                                                                                                                                                                                                                                                                                                                                                                                 | Grant / Contract | Other - employing organisation                                                  |
| <i>Recipient Name:</i> public health england<br><i>Grant / Contract Description:</i> Seasonal influenza - Zanamivir<br><i>Additional Information:</i> My employer Public Health England has received funding from GSK. for a research project related to analysis of observational data for seasonal influenza and antiviral treatment (zanamivir). This preceded and had no relation to COVID-19. However, i have had no personal role in this work or received any funding from this project. |                  | <i>Recipient Type:</i> Institution<br><i>Grant / Contract Purpose:</i> Research |

Additional Questions:

- Are there other relationships or activities that readers could perceive to have influenced, or that give the appearance of potentially influencing, what you wrote in the submitted work?**  
No.
- What is the manuscript title?**  
Impact of Vaccination on Household Transmission of SARS-COV-2 in England
- Are you the corresponding author?**  
No.

Certification

I certify that the information provided in this disclosure is complete and accurate.

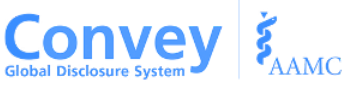

**Disclosure Purpose:** 21-07717

**Summary of Interests**

I do not have any interests to disclose at this time.

**Additional Questions:**

- 1. **Are there other relationships or activities that readers could perceive to have influenced, or that give the appearance of potentially influencing, what you wrote in the submitted work?**  
No.
- 2. **What is the manuscript title?**  
Impact of Vaccination on Household Transmission of SARS-COV-2 in England
- 3. **Are you the corresponding author?**  
No.

**Certification**

I certify that the information provided in this disclosure is complete and accurate.

**Disclosure Purpose:** 21-07717

## Summary of Interests

I do not have any interests to disclose at this time.

## Additional Questions:

- Are there other relationships or activities that readers could perceive to have influenced, or that give the appearance of potentially influencing, what you wrote in the submitted work?**  
No.
- What is the manuscript title?**  
Impact of Vaccination on Household Transmission of SARS-COV-2 in England
- Are you the corresponding author?**  
No.

## Certification

I certify that the information provided in this disclosure is complete and accurate.

Disclosure Purpose: 21-07717

## Summary of Interests

I do not have any interests to disclose at this time.

## Additional Questions:

1. **Are there other relationships or activities that readers could perceive to have influenced, or that give the appearance of potentially influencing, what you wrote in the submitted work?**

No.

2. **What is the manuscript title?**

Impact of Vaccination on Household Transmission of SARS-COV-2 in England

3. **Are you the corresponding author?**

Yes.

- a. **Please list the other authors' names here.**

Jennifer Hall; Asad Zaidi; Nick Andrews; Kevin Dunbar; Gavin Dabrera

## Certification

I certify that the information provided in this disclosure is complete and accurate.

**Disclosure Purpose:** 21-07717

**Summary of Interests**

I do not have any interests to disclose at this time.

**Additional Questions:**

- 1. **Are there other relationships or activities that readers could perceive to have influenced, or that give the appearance of potentially influencing, what you wrote in the submitted work?**  
No.
- 2. **What is the manuscript title?**  
Impact of Vaccination on Household Transmission of SARS-COV-2 in England
- 3. **Are you the corresponding author?**  
No.

**Certification**

I certify that the information provided in this disclosure is complete and accurate.
